# Supplementary material for: The clinical value of the patient-reported multiple sclerosis neuropsychological screening questionnaire
Source: PubMed Central journal article supplement — Mult Scler. 2018 May 18;25(11):1543–6. doi: 10.1177/1352458518777295 (PMC6753646; doi:10.1177/1352458518777295), 2018-05-18
Supplement: MSJ777295_supplementary_table_1.pdf [file MSJ777295_supplementary_table_1.pdf]

**Supplementary Table 1.** MSNQ-P cut-off scores and psychometric properties stratified for education

|                                 | Cut-off <sup>a</sup> | Sensitivity | Specificity | PPV | NPV | Accuracy <sup>b</sup> | AUC  |
|---------------------------------|----------------------|-------------|-------------|-----|-----|-----------------------|------|
| <i>Higher education (N=163)</i> |                      |             |             |     |     |                       |      |
| CI vs. MCI and CP               | 12                   | .87         | .40         | .25 | .93 | .48                   | .68* |
| CI and MCI vs. CP               | 12                   | .85         | .52         | .59 | .81 | .67                   | .69* |
| <i>Middle education (N=105)</i> |                      |             |             |     |     |                       |      |
| CI vs. MCI and CP               | 18                   | .62         | .46         | .31 | .76 | .50                   | .50  |
| CI and MCI vs. CP               | 18                   | .61         | .51         | .68 | .44 | .57                   | .55  |
| <i>Lower education (N=84)</i>   |                      |             |             |     |     |                       |      |
| CI vs. MCI and CP               | 30                   | .42         | .77         | .52 | .70 | .64                   | .58  |
| CI and MCI vs. CP               | 28                   | .40         | .79         | .87 | .28 | .49                   | .56  |

Abbreviations: CI=cognitively impaired; MCI=mildly cognitively impaired; CP=cognitively preserved; PPV=positive predictive value; NPV=negative predictive value; AUC=area under the curve. <sup>a</sup>Optimal cut-off score on the patient-reported Multiple Sclerosis Neuropsychological Questionnaire (MSNQ-P) to detect the cognitively impaired patient group (either CI or a combination of both CI and MCI patients). <sup>b</sup>% correctly classified as cognitively impaired and cognitively preserved. \*significantly different from .50 ( $p < .01$ ).
